# Supplementary material for: Evaluating methods of inferring gene regulatory networks highlights their lack of performance for single cell gene expression data
Source: PubMed Central journal article supplement (PMC6006753; doi:10.1186/s12859-018-2217-z), 2018-06-19
Supplement: 12859_2018_2217_MOESM1_ESM.pdf [file 12859_2018_2217_MOESM1_ESM.pdf]

Figure S1

**A** □

Model  
 Run both (ODEs and SDEs) ▼ DREAM4 settings

Experiments

|                | Steady state                        | Time series                         |
|----------------|-------------------------------------|-------------------------------------|
| Wild-type      | <input checked="" type="checkbox"/> |                                     |
| Knockout       | <input checked="" type="checkbox"/> | <input checked="" type="checkbox"/> |
| Knockdowns     | <input checked="" type="checkbox"/> | <input checked="" type="checkbox"/> |
| Multifactorial | <input checked="" type="checkbox"/> | <input checked="" type="checkbox"/> |
| Dual knockouts | <input checked="" type="checkbox"/> | <input checked="" type="checkbox"/> |

Time series as in DREAM4 (perturbation removed after  $t_{max}/2$ )

Number of time series  ▲▼

Duration of each time series ( $t_{max}$ )  ▲▼

Number of measured points per time series  ▲▼

Perturbations for multifactorial, dual knockouts, and DREAM4 time series

Generate new  
 Load from files

Noise

Noise in the dynamics of the networks (SDEs)  
 Coefficient of noise term  ▲▼

Noise added after the simulation (measurement error)

None  
 Model of noise in microarrays (used for DREAM4)  
 Add normal and/or log-normal noise

Add Gaussian noise with standard dev.  ▲▼  
 Add log-normal noise with standard dev.  ▲▼

Normalize after adding noise (as in DREAM4)

**B** □

Model  
 Run both (ODEs and SDEs) ▼ DREAM4 settings

Experiments

|                | Steady state                        | Time series                         |
|----------------|-------------------------------------|-------------------------------------|
| Wild-type      | <input checked="" type="checkbox"/> |                                     |
| Knockout       | <input checked="" type="checkbox"/> | <input checked="" type="checkbox"/> |
| Knockdowns     | <input checked="" type="checkbox"/> | <input checked="" type="checkbox"/> |
| Multifactorial | <input checked="" type="checkbox"/> | <input checked="" type="checkbox"/> |
| Dual knockouts | <input checked="" type="checkbox"/> | <input checked="" type="checkbox"/> |

Time series as in DREAM4 (perturbation removed after  $t_{max}/2$ )

Number of time series  ▲▼

Duration of each time series ( $t_{max}$ )  ▲▼

Number of measured points per time series  ▲▼

Perturbations for multifactorial, dual knockouts, and DREAM4 time series

Generate new  
 Load from files

Noise

Noise in the dynamics of the networks (SDEs)  
 Coefficient of noise term  ▲▼

Noise added after the simulation (measurement error)

None  
 Model of noise in microarrays (used for DREAM4)  
 Add normal and/or log-normal noise

Add Gaussian noise with standard dev.  ▲▼  
 Add log-normal noise with standard dev.  ▲▼

Normalize after adding noise (as in DREAM4)
