# Supplementary material for: Evaluating methods of inferring gene regulatory networks highlights their lack of performance for single cell gene expression data
Source: PubMed Central journal article supplement (PMC6006753; doi:10.1186/s12859-018-2217-z), 2018-06-19

Figure S5

### Community-detected edges

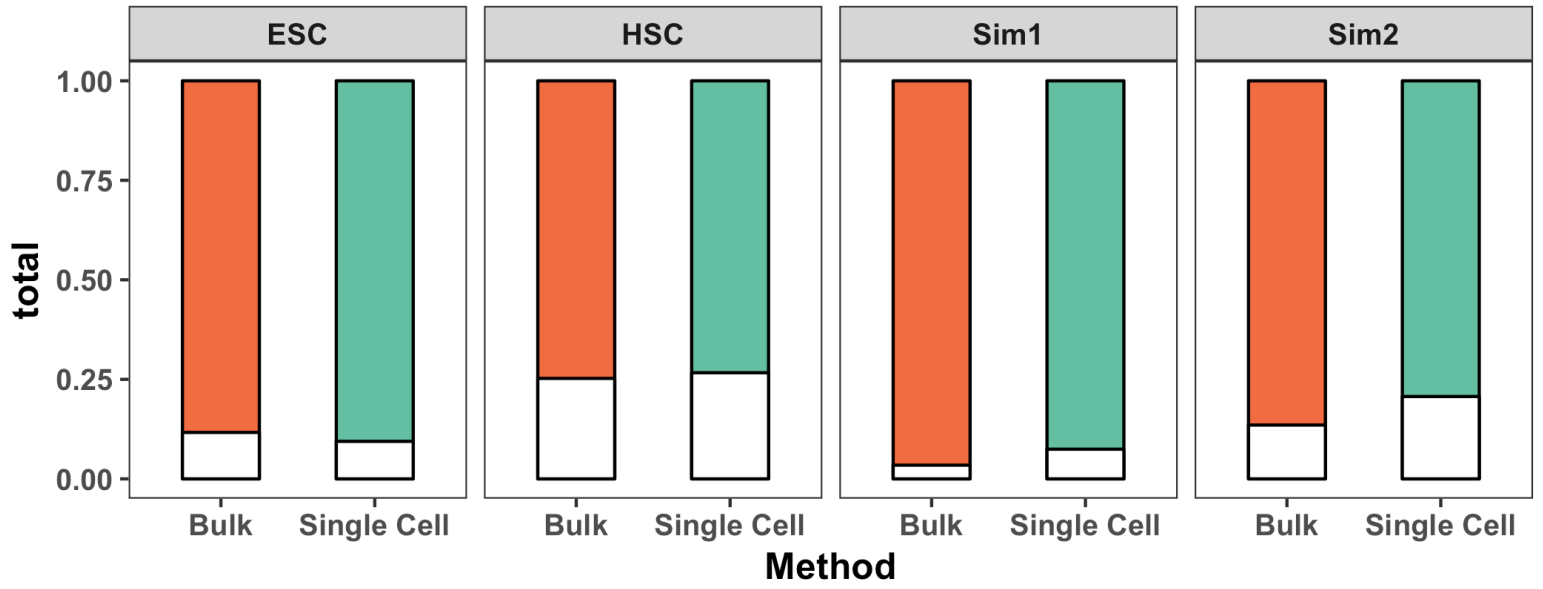

Supplement: 12859_2018_2217_MOESM6_ESM.pdf [file 12859_2018_2217_MOESM6_ESM.pdf]
